# Supplementary material for: Integrated computational model of cell cycle and checkpoint reveals different essential roles of Aurora-A and Plk1 in mitotic entry
Source: Royal Society of Chemistry journal article supplement (doi:10.1039/c0mb00004c), 2010-10-26
Supplement: c0mb00004c_tables1.pdf [file c0mb00004c_tables1.pdf]

**Table S1. List of biochemical reactions and related reaction rate in the computational model<sup>(a)</sup>.**

| No. <sup>(b)</sup> | Mechanism <sup>(c)</sup>                                         | Reaction rate law/rule <sup>(d)</sup>                                         |
|--------------------|------------------------------------------------------------------|-------------------------------------------------------------------------------|
| r01                | CyclinB + CDK1 <-> [CDK1:CyclinB]                                | kb_CyclinB_CDK1*CyclinB*CDK1 - kub*[CDK1:CyclinB]                             |
| r02                | CyclinB + CDK1_pY15 <-> [CDK1_pY15:CyclinB]                      | kb_CyclinB_CDK1*CyclinB*CDK1_pY15 - kub*[CDK1_pY15:CyclinB]                   |
| r03                | [CDK1:CyclinB] -> [CDK1_pT161:CyclinB]                           | Vm_CAK_CDK1B*[CDK1:CyclinB]/(km_CAK_CDK1B + [CDK1:CyclinB])                   |
| r04                | [CDK1_pY15:CyclinB] -> [CDK1_pY15_pT161:CyclinB]                 | Vm_CAK_CDK1B*[CDK1_pY15:CyclinB]/(km_CAK_CDK1B + [CDK1_pY15:CyclinB])         |
| r05                | [CDK1_pT161:CyclinB] -> [CDK1:CyclinB]                           | kdp*[CDK1_pT161:CyclinB]                                                      |
| r06                | [CDK1_pY15_pT161:CyclinB] -> [CDK1_pY15:CyclinB]                 | kdp*[CDK1_pY15_pT161:CyclinB]                                                 |
| r07                | Wee1 + [CDK1:CyclinB] <-> [Wee1:(CDK1:CyclinB)]                  | kb_Wee1_CDK1B*Wee1*[CDK1:CyclinB] - kub*[Wee1:(CDK1:CyclinB)]                 |
| r08                | [Wee1:(CDK1:CyclinB)] -> Wee1 + [CDK1_pY15:CyclinB]              | kcat_Wee1_CDK1B*[Wee1:(CDK1:CyclinB)]                                         |
| r09                | Wee1 + [CDK1_pT161:CyclinB] <-> [Wee1:(CDK1_pT161:CyclinB)]      | kb_Wee1_CDK1B*Wee1*[CDK1_pT161:CyclinB] - kub*[Wee1:(CDK1_pT161:CyclinB)]     |
| r10                | [Wee1:(CDK1_pT161:CyclinB)] -> Wee1 + [CDK1_pY15_pT161:CyclinB]  | kcat_Wee1_CDK1B*[Wee1:(CDK1_pT161:CyclinB)]                                   |
| r11                | [CDK1_pT161:CyclinB] + Wee1 <-> [(CDK1_pT161:CyclinB):Wee1]      | kb_CDK1B_Wee1*[CDK1_pT161:CyclinB]*Wee1 - kub*[(CDK1_pT161:CyclinB):Wee1]     |
| r12                | [(CDK1_pT161:CyclinB):Wee1] -> [CDK1_pT161:CyclinB] + Wee1_pT123 | kcat_CDK1B_Wee1*[(CDK1_pT161:CyclinB):Wee1]                                   |
| r13                | Wee1_pT123 -> Wee1                                               | kdp*Wee1_pT123                                                                |
| r14                | PLK1_pT210 + Wee1_pT123 <-> [PLK1_pT210:Wee1_pT123]              | kb_PLK1P_Wee1*PLK1_pT210*Wee1_pT123 - kub*[PLK1_pT210:Wee1_pT123]             |
| r15                | [PLK1_pT210:Wee1_pT123] -> PLK1_pT210                            | kcat_PLK1P_Wee1*[PLK1_pT210:Wee1_pT123]                                       |
| r16                | AuroraA_pT288 + CDC25 <-> [AuroraA_pT288: CDC25]                 | kb_AuroraAP_CDC25*AuroraA_pT288*CDC25 - kub*[AuroraA_pT288: CDC25]            |
| r17                | [AuroraA_pT288: CDC25] -> AuroraA_pT288 + CDC25_pS               | kcat_AuroraAP_CDC25*[AuroraA_pT288: CDC25]                                    |
| r18                | PLK1_pT210 + CDC25 <-> [PLK1_pT210: CDC25]                       | kb_PLK1P_CDC25*PLK1_pT210*CDC25 - kub*[PLK1_pT210: CDC25]                     |
| r19                | [PLK1_pT210: CDC25] -> PLK1_pT210 + CDC25_pS                     | kcat_PLK1P_CDC25*[PLK1_pT210: CDC25]                                          |
| r20                | [CDK1_pT161:CyclinB] + CDC25 <-> [(CDK1_pT161:CyclinB): CDC25]   | kb_CDK1B_CDC25*[CDK1_pT161:CyclinB]*CDC25 - kub*[(CDK1_pT161:CyclinB): CDC25] |
| r21                | [(CDK1_pT161:CyclinB): CDC25] -> [CDK1_pT161:CyclinB] + CDC25_pS | kcat_CDK1B_CDC25*[(CDK1_pT161:CyclinB): CDC25]                                |

|            |                                                                               |                                                                                              |
|------------|-------------------------------------------------------------------------------|----------------------------------------------------------------------------------------------|
| <b>r22</b> | CDC25_pS -> CDC25                                                             | kdp*CDC25_pS                                                                                 |
| <b>r23</b> | CDC25_pS + [CDK1_pY15:CyclinB] <-> [CDC25_pS:(CDK1_pY15:CyclinB)]             | kb_CDC25_CDK1B*CDC25_pS*[CDK1_pY15:CyclinB]-kub*[CDC25_pS:(CDK1_pY15:CyclinB)]               |
| <b>r24</b> | [CDC25_pS:(CDK1_pY15:CyclinB)] -> CDC25_pS + [CDK1:CyclinB]                   | kcat_CDC25_CDK1B*[CDC25_pS:(CDK1_pY15:CyclinB)]                                              |
| <b>r25</b> | CDC25_pS + [CDK1_pY15_pT161:CyclinB] <-> [CDC25_pS:(CDK1_pY15_pT161:CyclinB)] | kb_CDC25_CDK1B*CDC25_pS*[CDK1_pY15_pT161:CyclinB] - kub*[CDC25_pS:(CDK1_pY15_pT161:CyclinB)] |
| <b>r26</b> | [CDC25_pS:(CDK1_pY15_pT161:CyclinB)] -> CDC25_pS + [CDK1_pT161:CyclinB]       | kcat_CDC25_CDK1B*[CDC25_pS:(CDK1_pY15_pT161:CyclinB)]                                        |
| <b>r27</b> | AuroraA + AuroraA <-> [AuroraA:AuroraA]                                       | kb_AuroraA_AuroraA*AuroraA*AuroraA - kub*[AuroraA:AuroraA]                                   |
| <b>r28</b> | [AuroraA:AuroraA] -> AuroraA_pT288 + AuroraA                                  | kcat_AuroraA_AuroraA*[AuroraA:AuroraA]                                                       |
| <b>r29</b> | AuroraA_pT288 + AuroraA <-> [AuroraA_pT288:AuroraA]                           | kb_AuroraAP_AuroraA*AuroraA_pT288*AuroraA - kub*[AuroraA_pT288:AuroraA]                      |
| <b>r30</b> | [AuroraA_pT288:AuroraA] -> AuroraA_pT288 + AuroraA_pT288                      | kcat_AuroraAP_AuroraA*[AuroraA_pT288:AuroraA]                                                |
| <b>r31</b> | AuroraA_pT288 + PLK1 <-> [AuroraA_pT288:PLK1]                                 | kb_AuroraAP_PLK1*AuroraA_pT288*PLK1 - kub*[AuroraA_pT288:PLK1]                               |
| <b>r32</b> | [AuroraA_pT288:PLK1] -> AuroraA_pT288 + PLK1_pT210                            | kcat_AuroraAP_PLK1*[AuroraA_pT288:PLK1]                                                      |
| <b>r33</b> | Bora + PLK1 <-> [Bora:PLK1]                                                   | kb_Bora_PLK1*Bora*PLK1 - kub*[Bora:PLK1]                                                     |
| <b>r34</b> | AuroraA_pT288 + [Bora:PLK1] -> [AuroraA_pT288:(Bora:PLK1)]                    | kb_AuroraAP_BoraPLK1*AuroraA_pT288*[Bora:PLK1]                                               |
| <b>r35</b> | [AuroraA_pT288:(Bora:PLK1)] -> AuroraA_pT288 + Bora + PLK1_pT210              | kcat_AuroraAP_BoraPLK1*[AuroraA_pT288:(Bora:PLK1)]                                           |
| <b>r36</b> | PLK1_pT210 -> PLK1                                                            | kdp*PLK1_pT210                                                                               |
| <b>r37</b> | PLK1_pT210 + Bora <-> [PLK1_pT210:Bora]                                       | kb_PLK1P_Bora*PLK1_pT210*Bora - kub*[PLK1_pT210:Bora]                                        |
| <b>r38</b> | [PLK1_pT210:Bora] -> PLK1_pT210                                               | kcat_PLK1P_Bora*[PLK1_pT210:Bora]                                                            |
| <b>r39</b> | ATR -> ATR_active                                                             | kcat_damage*ATR                                                                              |
| <b>r40</b> | Claspin + CHK1 <-> [Claspin:CHK1]                                             | kb_Claspin_CHK1*Claspin*CHK1 - kub*[Claspin:CHK1]                                            |
| <b>r41</b> | ATR_active + [Claspin:CHK1] -> [ATR_active:(Claspin:CHK1)]                    | kb_ATR_ClaspinCHK1*ATR_active*[Claspin:CHK1]                                                 |
| <b>r42</b> | [ATR_active:(Claspin:CHK1)] -> ATR_active + Claspin + CHK1_pS                 | kcat_ATR_ClaspinCHK1*[ATR_active:(Claspin:CHK1)]                                             |
| <b>r43</b> | CHK1_pS -> CHK1                                                               | kdp*CHK1_pS                                                                                  |

|            |                                                  |                                                                    |
|------------|--------------------------------------------------|--------------------------------------------------------------------|
| <b>r44</b> | CHK1_pS + CDC25 <-> [CHK1_pS: CDC25]             | kb_CHK1_CDC25*CHK1_pS*CDC25 - kub*[CHK1_pS: CDC25]                 |
| <b>r45</b> | [CHK1_pS: CDC25] -> CHK1_pS + CDC25_ppp          | kcat_CHK1_CDC25*[CHK1_pS: CDC25]                                   |
| <b>r46</b> | [14-3-3] + CDC25_ppp <-> [14-3-3: CDC25_ppp]     | kb_1433_CDC25*[14-3-3]*CDC25_ppp - kub*[14-3-3: CDC25_ppp]         |
| <b>r47</b> | CDC25_ppp -> CDC25                               | kdp*CDC25_ppp                                                      |
| <b>r48</b> | PLK1_pT210 + Claspin <-> [PLK1_pT210: Claspin]   | kb_PLK1P_Claspin*PLK1_pT210*Claspin - kub*[PLK1_pT210: Claspin]    |
| <b>r49</b> | [PLK1_pT210: Claspin] -> PLK1_pT210              | kcat_PLK1P_Claspin*[PLK1_pT210: Claspin]                           |
| <b>r50</b> | null -> CyclinB                                  | ks_CyclinB*(CyclinB_max-CyclinB_total)/(CyclinB_max*CyclinB_total) |
| <b>r51</b> | null -> AuroraA                                  | ks_AuroraA*(AuroraA_max-AuroraA_total)/(AuroraA_max*AuroraA_total) |
| <b>r52</b> | null -> Bora                                     | ks_Bora*(Bora_max-Bora_total)/(Bora_max*Bora_total)                |
| <b>r53</b> | null -> PLK1                                     | ks_PLK1*(PLK1_max-PLK1_total)/(PLK1_max*PLK1_total)                |
| <b>r54</b> | AuroraA + VX680 <-> [AuroraA: VX680]             | kb_AuroraA_VX*AuroraA* VX680 - kub*[AuroraA: VX680]                |
| <b>r55</b> | AuroraA_pT288 + VX680 <-> [AuroraA_pT288: VX680] | kb_AuroraA_VX*AuroraA_pT288* VX680 - kub*[AuroraA_pT288: VX680]    |
| <b>r56</b> | PLK1 + BI2536 <-> [PLK1: BI2536]                 | kb_PLK1_BI*PLK1* BI2536 - kub*[PLK1: BI2536]                       |
| <b>r57</b> | PLK1_pT210 + BI2536 <-> [PLK1_pT210: BI2536]     | kb_PLK1_BI*PLK1_pT210* BI2536 - kub*[ PLK1_pT210: BI2536]          |

- (a) An idealized cell may be considered as a sphere with a diameter of  $1.25 \times 10^{-5}$  m, resulting in a cell volume of roughly  $2 \times 10^{-12}$  L. Given a typical concentration of a specific protein to be 1 nM, we calculate the total protein number of  $1.2 \times 10^3$  molecules/cell. For a reaction volume containing  $1.2 \times 10^3$  molecules, we are justified in using ordinary differential equations to describe changes in a continuous concentration of molecular species. The concentration of molecular species was in units of molecules/cell. Quantitative analysis of the experimental time series data of the protein levels of molecular species was performed with QuantityOne software (Bio-Rad) as described<sup>1-3</sup>. Biochemical reactions between species of the same proteins (e.g. with different phosphorylation states) were assumed to have the same reaction rate parameters.
- (b) Description of biochemical reactions:  
**r01** and **r02**: Cyclin B and cyclin-dependent kinase 1 (Cdk1) form cyclin B/Cdk1, which is the key regulator of cell cycle progression<sup>4, 5</sup>.  
 $[CDK1]_{t=0} = 2 \times 10^5$  molecules/cell<sup>6</sup>.

- r03** and **r04**: Phosphorylation of Cdk1 on Thr161 by Cdk-activating kinase (CAK) is required for the complete activation of cyclin B/Cdk1<sup>7, 8</sup>. The process is mathematically expressed as Michaelis-Menten equations, in which the Michaelis constant  $k_{m\_CAK\_CDK1B}$  is  $7.08 \times 10^5$  molecule, and the maximal reaction rate  $V_{m\_CAK\_CDK1B}$  is  $1.93 \times 10^{11}$  (molecule min<sup>-1</sup>)<sup>7</sup>.
- r05** and **r06**: Dephosphorylation of Cdk1-pT161.
- r07** – **r10**: Cdk1 is held inactive by the phosphorylation on Thr14 and Tyr15 by kinase Wee1 during the S and G2 phases prior to mitosis<sup>9, 10</sup>.  $[Wee1]_{t=0} = 2.5 \times 10^4$  (molecules/cell)<sup>11</sup>.
- r11** and **r12**: Activated cyclin B-Cdk1 phosphorylates Wee1 on Ser123, thereby creating a binding site for kinase Plk1<sup>11-14</sup>.
- r13**: Dephosphorylation of Wee1-pT123.
- r14** and **r15**: Phosphorylation on Ser123 of Wee1 creates the binding site for the Plk1 PBD domain and accelerates the further phosphorylation of Wee1 by Plk1, which induces the degradation of Wee1 by  $\beta$ -TrCP ubiquitin-proteasome system<sup>12, 14</sup>.
- r16** – **r19**: Activated Aurora-A and Plk1 will directly phosphorylate Cdc25 and thereby stimulate its phosphatase activity<sup>15-18</sup>.  $[Cdc25]_{t=0} = 1 \times 10^4$  (molecules/cell)<sup>11, 19</sup>.
- r20** and **r21**: Following activation, cyclin B-Cdk1 phosphorylates and activates Cdc25<sup>20, 21</sup>.
- r22**: Dephosphorylation of Cdc25.
- r23** – **r26**: The dual specificity phosphatase Cdc25 dephosphorylates Thr14 and Tyr15 of Cdk1, thereby activating cyclin B-Cdk1<sup>21-23</sup>.
- r27** – **r30**: During mitotic entry, the kinase activity of Aurora-A depends on the auto-phosphorylation of Thr288 in its T loop<sup>24-26</sup>.
- r31** and **r32**: Activated Aurora-A will phosphorylate Thr210 of Plk1 and thereby promote its activation<sup>27, 28</sup>.
- r33** – **r35**: Bora directly binds to Plk1 and controls the accessibility of its activation loop for phosphorylation, which greatly enhances the activation effect by Aurora-A<sup>27, 28</sup>.
- r36**: Dephosphorylation of Plk1-pT210.
- r37** and **r38**: The degradation of Bora depends on Plk1 mediated phosphorylation<sup>29</sup>.
- r39**: In response to G2 DNA damage, the activity of ataxia–telangiectasia and rad3-related ATR kinase is triggered<sup>30, 31</sup>.  $[ATR]_{t=0} = 2.4 \times 10^3$  (molecules/cell)<sup>32</sup>. To mimic the DNA-damage response, the parameter  $k_{cat\_damage}$  representing ATR activation was set to 0.8; and during checkpoint recovery,  $k_{cat\_damage}$  was reset to zero. These settings give model simulations that are consistent with previous experimental observations<sup>32</sup>.
- r40** – **r42**: Activated ATR will phosphorylate and activate checkpoint kinase Chk1, in the assistance of Claspin<sup>33-35</sup>.  $[Chk1]_{t=0} = 2.4 \times 10^4$  (molecules/cell)<sup>32</sup>.
- r43**: Dephosphorylation of Chk1.
- r44** – **r46**: Once activated, Chk1 will inhibit the phosphatase activity of Cdc25 by phosphorylating and promoting its association with decoy protein 14-3-3<sup>33, 36, 37</sup>.

**r47:** Dephosphorylation of Cdc25.

**r48 and r49:** Plk1-mediated degradation of Claspin by ubiquitin and proteasome system during checkpoint recovery<sup>38-41</sup>.

**r50 – r53: Definition of protein synthesis.** The synthesis of cyclin B, Aurora-A, Plk1 and Bora were formulated as sigmoid functions. The initial values of the corresponding reaction rate parameters (i.e.  $ks1\_ProteinName$ ,  $ks2\_ProteinName$ ) were estimated by fitting to the experimental data. The protein maximum levels (i.e.  $ProteinName\_max$ ) were obtained from previous experimental measurements. It is found that the sigmoid functions give simulation results that are absolutely consistent with experimental values (i.e. the protein expression pattern). Whereas, using a simple method considering only constant rate of protein synthesis and linear protein degradation gives disappointing simulation results that are inconsistent with the experimental values (data not shown).

**r50:** The synthesis of cyclin B<sup>28, 42</sup>.

$$[CyclinB\_max]_{t=0} = 8 \times 10^3 \text{ (molecules/cell)}^6.$$

$$[CyclinB\_total] = [(CDK1\_pT161:CyclinB):Wee1] + [(CDK1\_pT161:CyclinB):CDC25] + [CDC25\_pS:(CDK1\_pY15:CyclinB)] + [CDC25\_pS:(CDK1\_pY15\_pT161:CyclinB)] + [CDK1:CyclinB] + [CDK1\_pT161:CyclinB] + [CDK1\_pY15:CyclinB] + [CDK1\_pY15\_pT161:CyclinB] + [CyclinB] + [Wee1:(CDK1:CyclinB)] + [Wee1:(CDK1\_pT161:CyclinB)].$$

$$ks\_CyclinB = 100.57e^{0.0126T}. \text{ (Note: } T \text{ is simulation time)}$$

**r51:** The synthesis of Aurora-A<sup>28, 29</sup>.

$$[AuroraA\_max]_{t=0} = 7.2 \times 10^3 \text{ (molecules/cell)}^{24, 43}.$$

$$[AuroraA\_total] = [AuroraA] + 2*[AuroraA:AuroraA] + [AuroraA\_pT288] + [AuroraA\_pT288:(Bora:PLK1)] + 2*[AuroraA\_pT288:AuroraA] + [AuroraA\_pT288:CDC25] + [AuroraA\_pT288:PLK1].$$

$$ks\_AuroraA = 180.38e^{0.0172T}.$$

**r52:** The synthesis of Bora<sup>28, 29</sup>.

$$[Bora\_max]_{t=0} = 4.5 \times 10^3 \text{ (molecules/cell)}^{28}.$$

$$[Bora\_total] = [AuroraA\_pT288:(Bora:PLK1)] + [Bora] + [Bora:PLK1] + [PLK1\_pT210:Bora].$$

$$ks\_Bora = 221.95e^{0.0141T}.$$

**r53:** The synthesis of Plk1<sup>28, 29, 44</sup>.

$$[PLK1\_max]_{t=0} = 9.6 \times 10^3 \text{ (molecules/cell)}^{43, 45}.$$

$$[PLK1\_total] = [AuroraA\_pT288:(Bora:PLK1)] + [AuroraA\_pT288:PLK1] + [Bora:PLK1] + [PLK1] + [PLK1\_pT210] +$$

$[PLK1\_pT210:Bora] + [PLK1\_pT210:CDC25] + [PLK1\_pT210:Claspin] + [PLK1\_pT210:Wee1\_pT123]$ .

$$k_{s\_PLK1} = 155.73e^{0.0160T}.$$

**r54** and **r55**: The Aurora-A inhibitor VX-680 can bind with both the unphosphorylated form (*Aurora-A*) and the phosphorylated form (*AuroraA\_pT288*) of Aurora-A.  $k_{b\_AuroraA\_VX} = 1.3 \times 10^{-7}$  (molecule<sup>-1</sup> min<sup>-1</sup>)<sup>46</sup>.

**r56** and **r57**: The PLK1 inhibitor BI-2536 can bind with both the unphosphorylated form (*PLK1*) and the phosphorylated form (*PLK1\_pT210*) of PLK1.  $k_{b\_PLK1\_BI} = 6.8 \times 10^{-7}$  (molecule<sup>-1</sup> min<sup>-1</sup>)<sup>47,48</sup>.

(c) Definition of abbreviations used:

- : indicates a protein complex;
- \_p\*\* indicates that a protein is phosphorylated;
- <-> indicates a reversible reaction;
- > indicates an irreversible reaction;
- null -> indicates that a species is synthesized;
- > null indicates that a species is degraded.

(d) The simulation time was in units of minute. Protein unbinding rates  $k_{ub}$  were set to 0.1 min<sup>-1</sup>, which is of the same order of magnitude as in other mathematical models<sup>2,3</sup>. The dephosphorylation rates  $k_{dp}$  were set to 0.008 (min<sup>-1</sup>)<sup>49</sup>.

## References

1. B. E. McGuinness, M. Anger, A. Kouznetsova, A. M. Gil-Bernabe, W. Helmhart, N. R. Kudo, A. Wuensche, S. Taylor, C. Hoog, B. Novak and K. Nasmyth, *Curr. Biol.*, 2009, **19**, 369-380.
2. T. Haberichter, B. Madge, R. A. Christopher, N. Yoshioka, A. Dhiman, R. Miller, R. Gendelman, S. V. Aksenov, I. G. Khalil and S. F. Dowdy, *Mol. Syst. Biol.*, 2007, **3**, 84.
3. B. Schoeberl, C. Eichler-Jonsson, E. D. Gilles and G. Müller, *Nat. Biotechnol.*, 2002, **20**, 370-375.
4. M. Malumbres and M. Barbacid, *Nat. Rev. Cancer*, 2009, **9**, 153-166.
5. J. Pines and T. Hunter, *J. Cell Biol.*, 1991, **115**, 1-17.
6. T. Arooz, C. H. Yam, W. Y. Siu, A. Lau, K. K. Li and R. Y. Poon, *Biochemistry*, 2000, **39**, 9494-9501.
7. K. A. Merrick, S. Larochelle, C. Zhang, J. J. Allen, K. M. Shokat and R. P. Fisher, *Mol. Cell*, 2008, **32**, 662-672.
8. D. Desai, H. Wessling, R. Fisher and D. Morgan, *Mol. Cell. Biol.*, 1995, **15**, 345-350.
9. H. Hochegger, S. Takeda and T. Hunt, *Nat. Rev. Mol. Cell Biol.*, 2008, **9**, 910-916.

10. L. Parker and H. Piwnica-Worms, *Science*, 1992, **257**, 1955-1957.
11. J. R. Pomerening, S. Y. Kim and J. E. Ferrell, *Cell*, 2005, **122**, 565-578.
12. N. Watanabe, H. Arai, J. Iwasaki, M. Shiina, K. Ogata, T. Hunter and H. Osada, *Proc. Natl. Acad. Sci. USA*, 2005, **102**, 11663-11668.
13. B. Novák, J. J. Tyson, B. Györfy and A. Csikasz-Nagy, *Nat. Cell Biol.*, 2007, **9**, 724-728.
14. N. Watanabe, H. Arai, Y. Nishihara, M. Taniguchi, T. Hunter and H. Osada, *Proc. Natl. Acad. Sci. USA*, 2004, **101**, 4419-4424.
15. A. R. Barr and F. Gergely, *J. Cell Sci.*, 2007, **120**, 2987-2996.
16. G. Vader and S. M. Lens, *Biochim. Biophys. Acta*, 2008, **1786**, 60-72.
17. V. Archambault and D. M. Glover, *Nat. Rev. Mol. Cell Biol.*, 2009, **10**, 265-275.
18. T. Takaki, K. Trenz, V. Costanzo and M. Petronczki, *Curr. Opin. Cell Biol.*, 2008, **20**, 650-660.
19. W. Chen, M. Wilborn and J. Rudolph, *Biochemistry*, 2000, **39**, 10781-10789.
20. R. Boutros, C. Dozier and B. Ducommun, *Curr. Opin. Cell Biol.*, 2006, **18**, 185-191.
21. R. Boutros, V. Lobjois and B. Ducommun, *Nat. Rev. Cancer*, 2007, **7**, 495-507.
22. J. Rudolph, *Nat. Rev. Cancer*, 2007, **7**, 202-211.
23. U. Strausfeld, J. C. Labbe, D. Fesquet, J. C. Cavadore, A. Picard, K. Sadhu, P. Russell and M. Doree, *Nature*, 1991, **351**, 242-245.
24. K. Anderson, J. Yang, K. Koretke, K. Nurse, A. Calamari, R. B. Kirkpatrick, D. Patrick, D. Silva, P. J. Tummino, R. A. Copeland and Z. Lai, *Biochemistry*, 2007, **46**, 10287-10295.
25. A. H. Kishore, B. M. Vedamurthy, K. Mantelingu, S. Agrawal, B. A. Reddy, S. Roy, K. S. Rangappa and T. K. Kundu, *J. Med. Chem.*, 2008, **51**, 792-797.
26. M. G. Manfredi, J. A. Ecsedy, K. A. Meetze, S. K. Balani, O. Burenkova, W. Chen, K. M. Galvin, K. M. Hoar, J. J. Huck, P. J. LeRoy, E. T. Ray, T. B. Sells, B. Stringer, S. G. Stroud, T. J. Vos, G. S. Weatherhead, D. R. Wysong, M. Zhang, J. B. Bolen and C. F. Claiborne, *Proc. Natl. Acad. Sci. USA*, 2007, **104**, 4106-4111.
27. L. Macůrek, A. Lindqvist, D. Lim, M. A. Lampson, R. Klompmaker, R. Freire, C. Clouin, S. S. Taylor, M. B. Yaffe and R. H. Medema, *Nature*, 2008, **455**, 119-123.
28. A. Seki, J. A. Coppinger, C.-Y. Jang, J. R. Yates and G. Fang, *Science*, 2008, **320**, 1655-1658.
29. A. Seki, J. A. Coppinger, H. Du, C.-Y. Jang, J. R. Yates and G. Fang, *J. Cell Biol.*, 2008, **181**, 65-78.
30. J. Bartek, C. Lukas and J. Lukas, *Nat. Rev. Mol. Cell Biol.*, 2004, **5**, 792-804.
31. J. W. Harper and S. J. Elledge, *Mol. Cell*, 2007, **28**, 739-745.
32. J. H. Choi, L. A. Lindsey-Boltz and A. Sancar, *Proc. Natl. Acad. Sci. USA*, 2007, **104**, 13301-13306.
33. H. C. Reinhardt and M. B. Yaffe, *Curr. Opin. Cell Biol.*, 2009, **21**, 245-255.
34. H. Zhao and H. Piwnica-Worms, *Mol. Cell. Biol.*, 2001, **21**, 4129-4139.

35. Q. Liu, S. Guntuku, X.-S. Cui, S. Matsuoka, D. Cortez, K. Tamai, G. Luo, S. Carattini-Rivera, F. DeMayo, A. Bradley, L. A. Donehower and S. J. Elledge, *Genes Dev.*, 2000, **14**, 1448-1459.
36. D. Branzei and M. Foiani, *Nat. Rev. Mol. Cell Biol.*, 2008, **9**, 297-308.
37. K. A. Cimprich and D. Cortez, *Nat. Rev. Mol. Cell Biol.*, 2008, **9**, 616-627.
38. M. A. Vugt, A. Bras and R. H. Medema, *Cancer Res.*, 2005, **65**, 7037-7040.
39. N. Mailand, S. Bekker-Jensen, J. Bartek and J. Lukas, *Mol. Cell*, 2006, **23**, 307-318.
40. A. Peschiaroli, N. V. Dorrello, D. Guardavaccaro, M. Venere, T. Halazonetis, N. E. Sherman and M. Pagano, *Mol. Cell*, 2006, **23**, 319-329.
41. M. A. Vugt, A. Bras and R. H. Medema, *Mol. Cell*, 2004, **15**, 799-811.
42. A. Krystyniak, C. Garcia-Echeverria, C. Prigent and S. Ferrari, *Oncogene*, 2006, **25**, 338-348.
43. Y. Moshe, J. Boulaire, M. Pagano and A. Hershko, *Proc. Natl. Acad. Sci. USA*, 2004, **101**, 7937-7942.
44. E. Chan, A. Santamaria, Sillj, Herman and E. Nigg, *Chromosoma*, 2008, **117**, 457-469.
45. T. M. Johnson, R. Antrobus and L. N. Johnson, *Biochemistry*, 2008, **47**, 3688-3696.
46. E. A. Harrington, D. Bebbington, J. Moore, R. K. Rasmussen, A. O. Ajose-Adeogun, T. Nakayama, J. A. Graham, C. Demur, T. Hercend, A. Diu-Hercend, M. Su, J. M. Golec and K. M. Miller, *Nat. Med.*, 2004, **10**, 262-267.
47. P. Lenart, M. Petronczki, M. Steegmaier, B. D. Fiore, J. J. Lipp, M. Hoffmann, W. J. Rettig, N. Kraut and J.-M. Peters, *Curr. Biol.*, 2007, **17**, 304-315.
48. M. Steegmaier, M. Hoffmann, A. Baum, P. Lenart, M. Petronczki, M. Krssak, U. Gurtler, P. Garin-Chesa, S. Lieb, J. Quant, M. Grauert, G. R. Adolf, N. Kraut, J.-M. Peters and W. J. Rettig, *Curr. Biol.*, 2007, **17**, 316-322.
49. T. Y. Tsai, Y. S. Choi, W. Ma, J. R. Pomerening, C. Tang and J. E. Ferrell, *Science*, 2008, **321**, 126-129.
